# Supplementary material
Source: PubMed Central journal article supplement (PMC8921541)
Supplement: mmc1.pdf [file mmc1.pdf]

## Supplementary Materials

### **A Thermostable Cas12b from *Brevibacillus* Leverages One-pot Detection of SARS-CoV-2 Variants of Concern**

Long T. Nguyen<sup>1</sup>, Nicolas C. Macaluso<sup>1</sup>, Brianna L.M. Pizzano<sup>2</sup>, Melanie N. Cash<sup>3,4</sup>, Jan Spacek<sup>5</sup>, Jan Karasek<sup>6</sup>, Rhoel R. Dinglasan<sup>4,7</sup>, Marco Salemi<sup>3,4</sup>, Piyush K. Jain<sup>1,8\*</sup>

<sup>1</sup>Department of Chemical Engineering, Herbert Wertheim College of Engineering, University of Florida, Gainesville FL, USA

<sup>2</sup>Department of Agricultural and Biological Engineering, College of Agricultural and Life Sciences, University of Florida, Gainesville FL, USA

<sup>3</sup>Department of Pathology, Immunology and Laboratory Medicine, College of Medicine, University of Florida, Gainesville FL, USA

<sup>4</sup>Emerging Pathogens Institute, University of Florida, Gainesville FL, USA

<sup>5</sup>Sparsek s.r.o. Příkop 838/6, Zábřovice, 602 00 Brno, Czech Republic

<sup>6</sup>SCIERING s.r.o., Příkop 838/6, 621 00 Brno, Czech Republic

<sup>7</sup>Department of Infectious Diseases & Immunology, College of Veterinary Medicine, University of Florida, Gainesville FL, USA

<sup>8</sup>UF Health Cancer Center, University of Florida, Gainesville FL, USA

\*Corresponding author: [Jainp@ufl.edu](mailto:Jainp@ufl.edu)

Table of contents

**Figure S1.** Sequence alignment of AapCas12 and BrCas12b against the structure of AacCas12b ----- 3

**Figure S2.** Differential scanning fluorimetry of Apo and binary complexes of AacCas12b, AapCas12b, and BrCas12b ----- 4

**Figure S3.** Trans-cleavage kinetic analysis of BrCas12b ----- 5

**Figure S4.** BrCas12b one-pot reaction optimization ----- 6

**Figure S5.** Effects of reporters on BrCas12 one-pot detection reaction ----- 7

**Figure S6.** Specificity of single-guide RNA designs among the tested SARS-CoV-2 variants of concerns ----- 8

**Figure S7.** Clinical validation of one-pot BrCa12b detection assay (supplement to figure 2 in the main text) ----- 9

**Figure S8.** Percent accuracy of patient sample validation ----- 10

**Figure S9.** Sequence alignment of patient samples in reference to wild-type SARS-CoV-2 genomic RNA ----- 11

**Figure S10.** Stability test of the lyophilized BrCas12b-based one-pot detection reagents ----- 12

**Table S1.** Clinical characteristics of SPADE with S gene in 30 minutes ----- 13

**Table S2.** Portable multiplexing detection device (FISSH) specifications -----13

**Table S3.** Sequences used in the study ----- 14

**Table S4.** GISAID information for clinical samples -----18

**Table S5.** Detailed Resource Information -----20

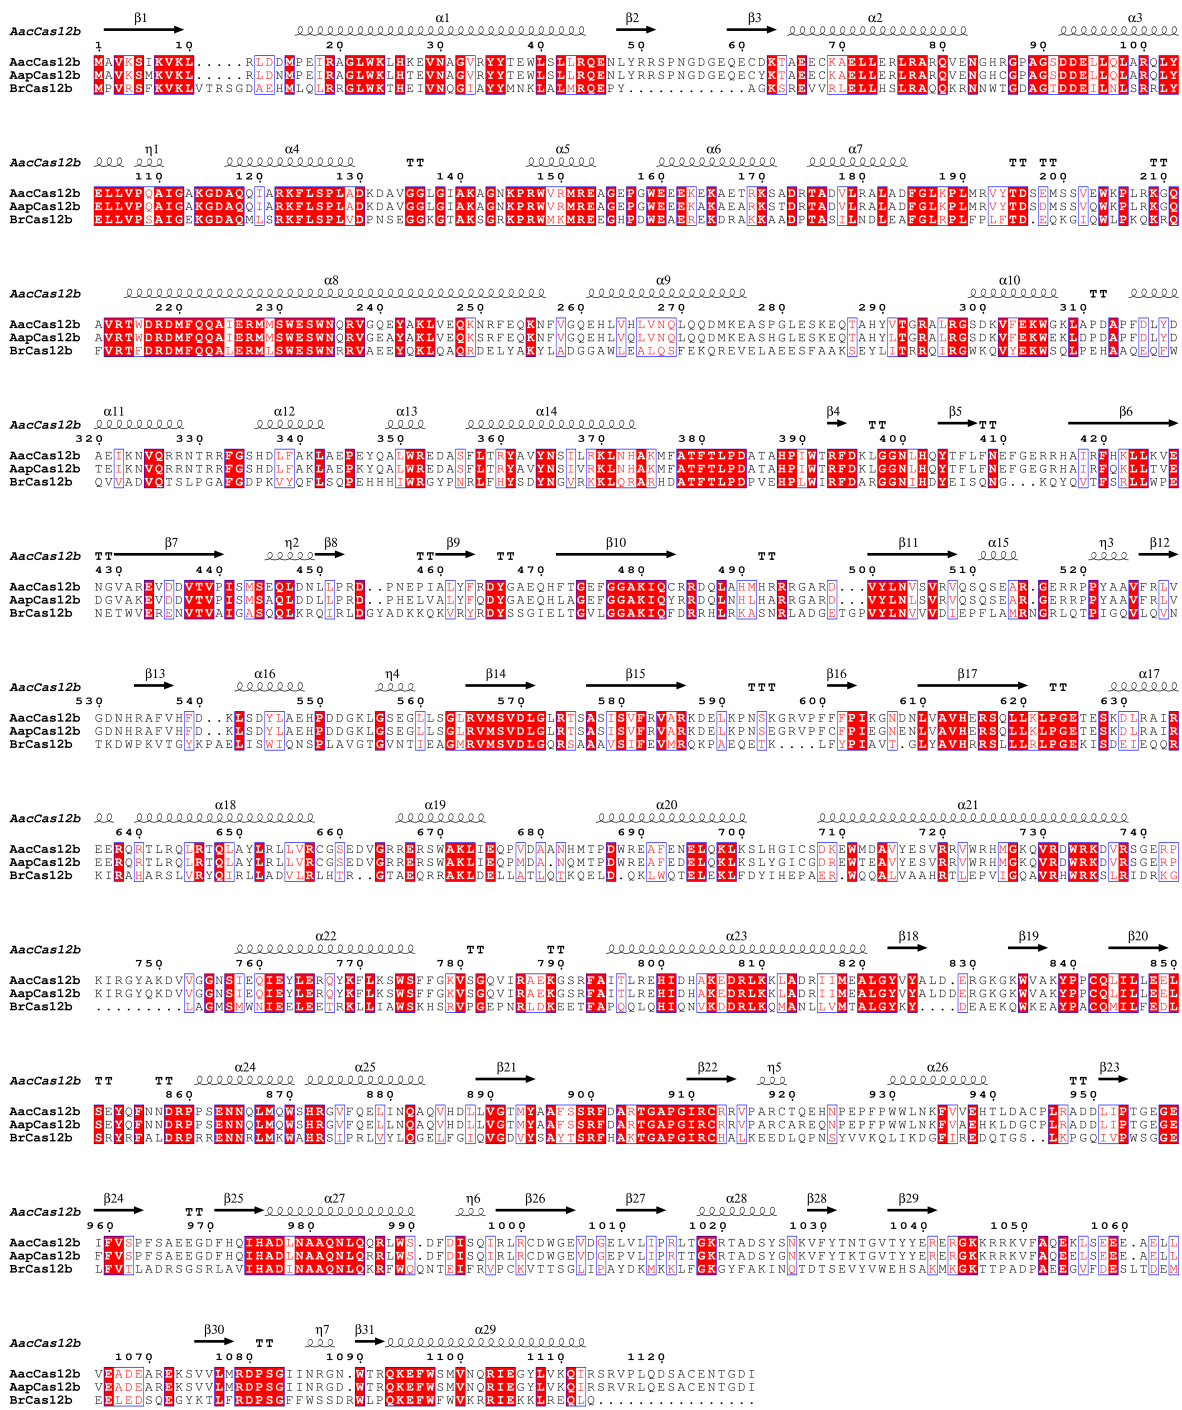

**Figure S1. Sequence alignment of AapCas12b and BrCas12b against the structure of AacCas12b.** The sequences of the above effectors were aligned using MultiAlin with Blosum62-12-2. The aligned sequence file was imported into Esript 3.0(1) and aligned against the AacCas12b structure (PDBID: 5U30)(2).

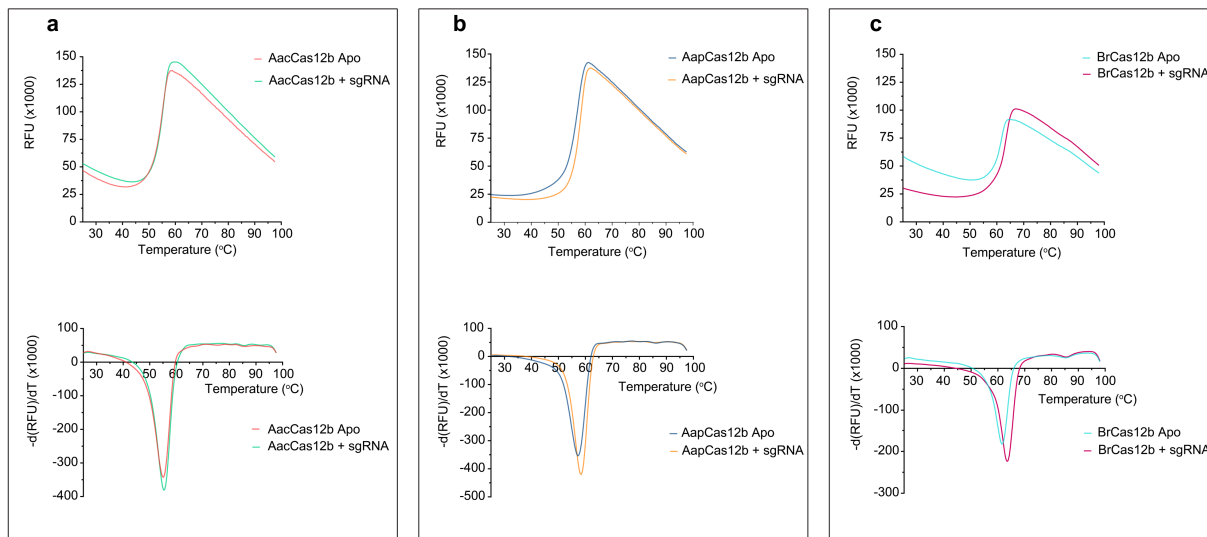

**Figure S2. Differential scanning fluorimetry of Apo and binary complexes of AacCas12b, AapCas12b, and BrCas12b.** The reaction was performed in duplicates and repeated twice ( $n = 2$  biological replicates). The melting temperature was determined based on the global minimum of derivative fluorescence with respect to temperature.

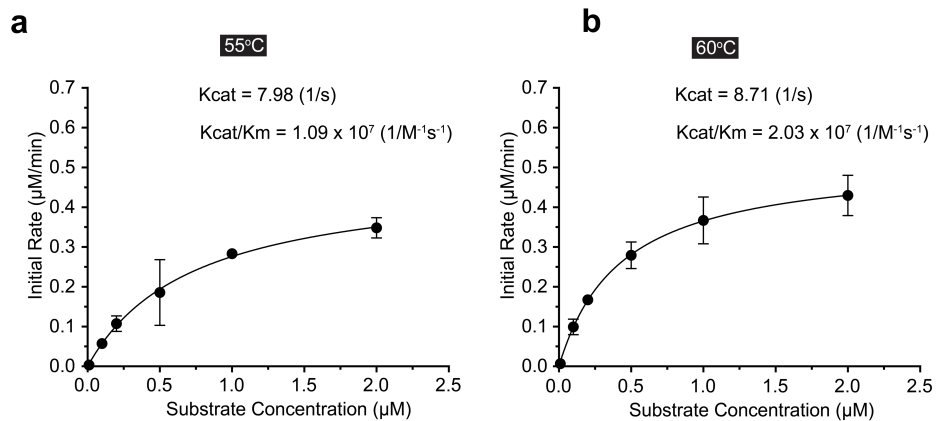

**Figure S3. Trans-cleavage kinetic analysis of BrCas12b.** (a) at 55°C and (b) at 60°C, (n = 2 biological replicates).

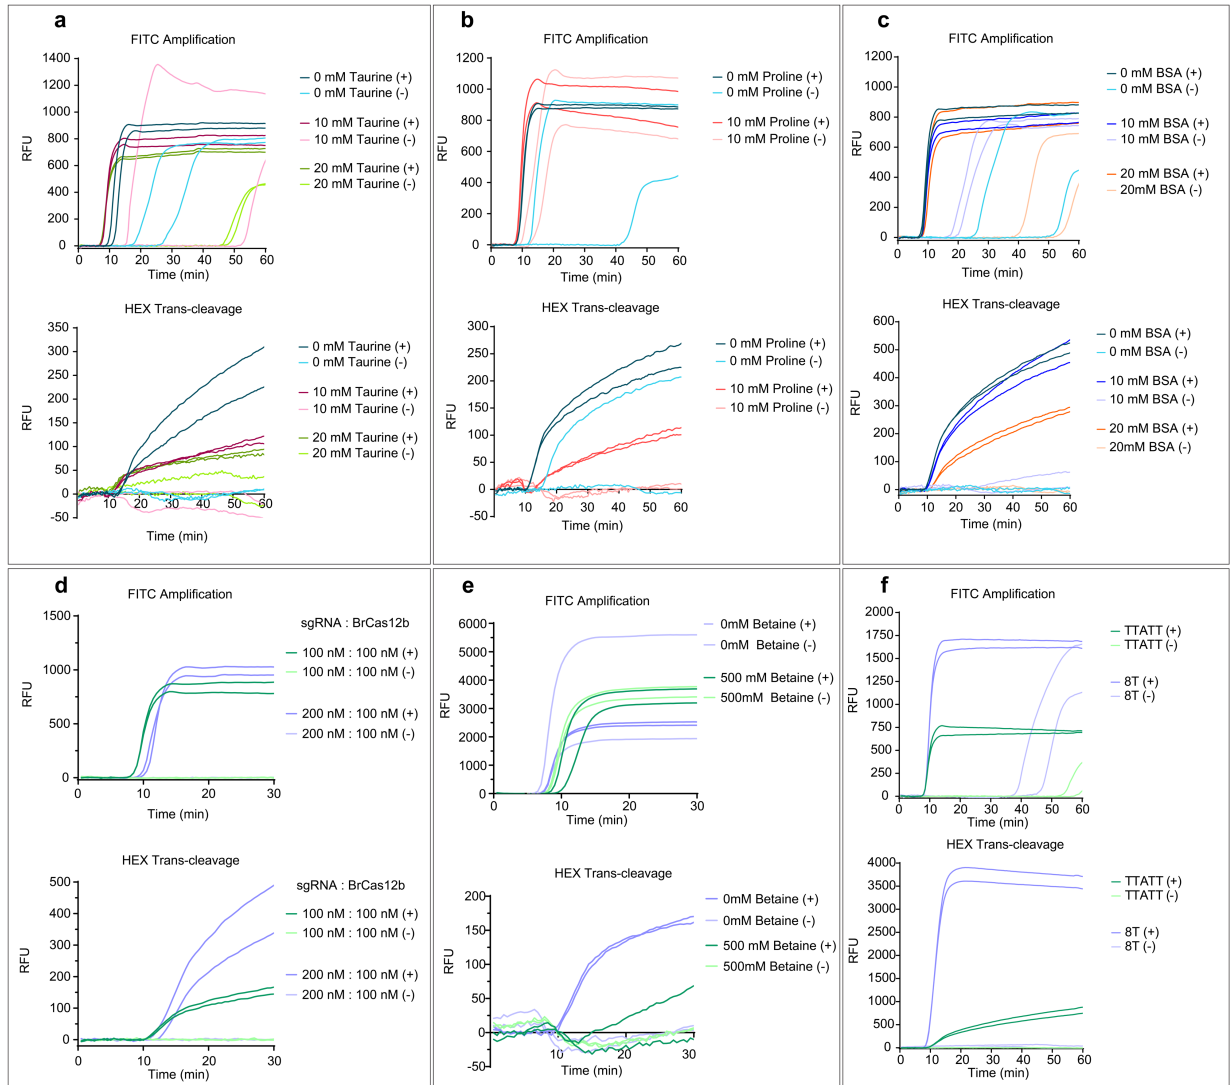

**Figure S4. BrCas12b one-pot reaction optimization.** (a) – (f) Various additives including taurine, proline, bovine serum albumin (BSA), and betaine were used in (a), (b), (c), and (d). Additionally, sgRNA, BrCas12b concentrations, and reporters were also optimized in (e) and (f). FAM channel indicates LAMP amplification detecting SYTO™ 9, and HEX channel was used to detect BrCas12b trans-cleavage activity.

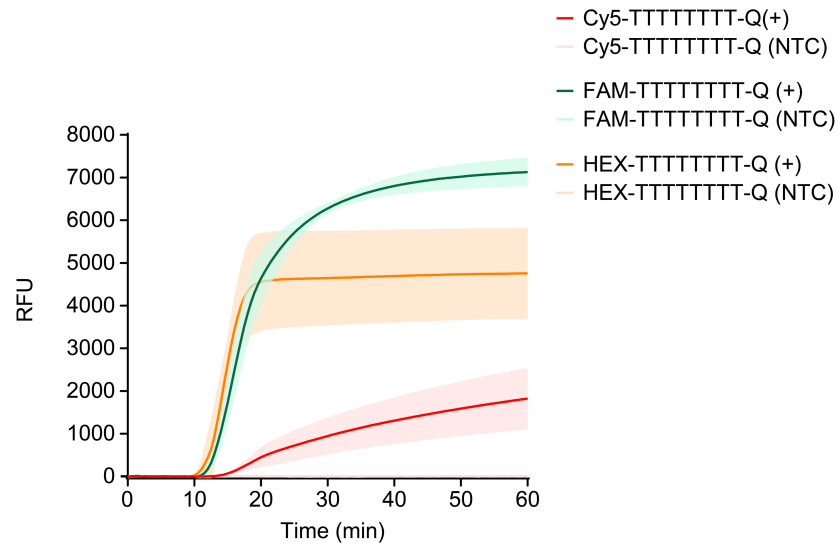

**Figure S5. Effects of reporters on BrCas12 one-pot detection reaction.** Different fluorophores (FAM, HEX, and Cy5) were placed on the 3'-end of the reporter that connects to a quencher via an 8-mer poly-T linker. FAM- and HEX-based reporters exhibited higher sensitivity compared to Cy5-based reporter at the same concentration. The shaded area represents standard deviation, n = 3 biological replicates).

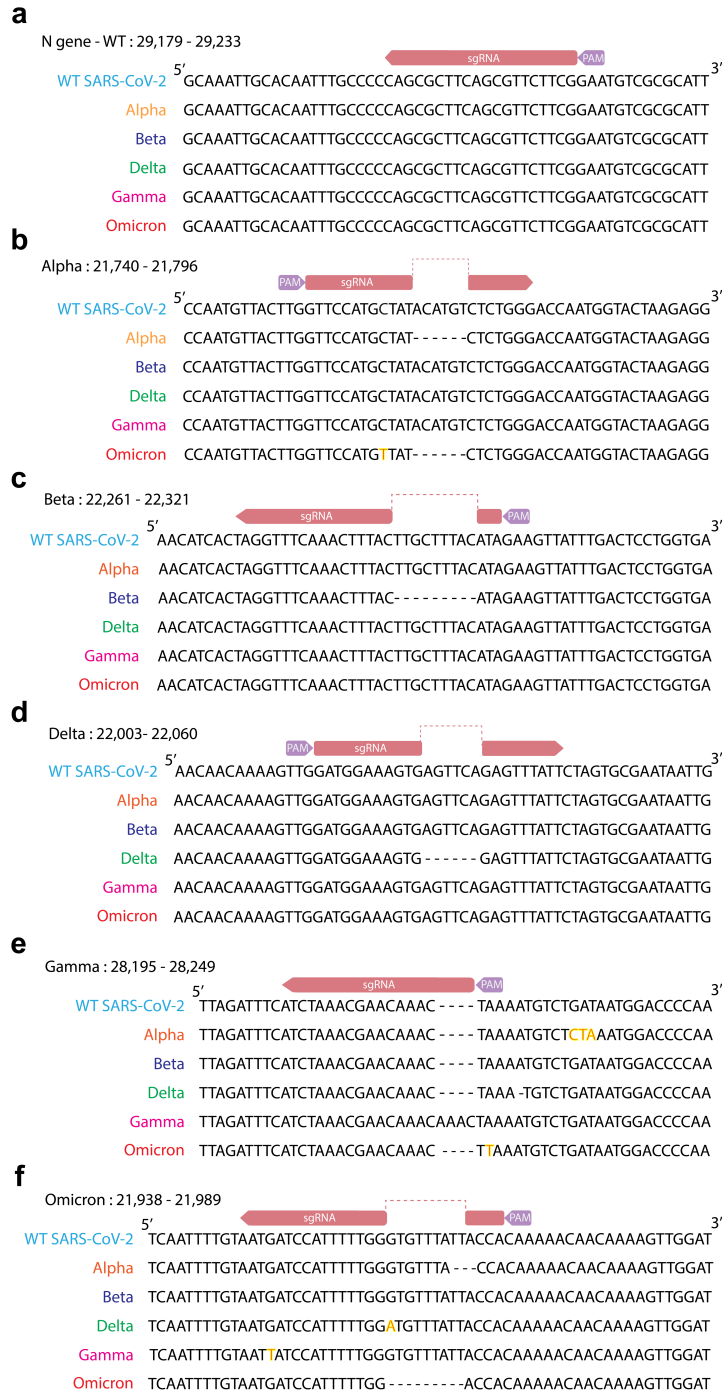

**Figure S6. Specificity of single-guide RNA designs among the tested SARS-CoV-2 variants of concerns.**



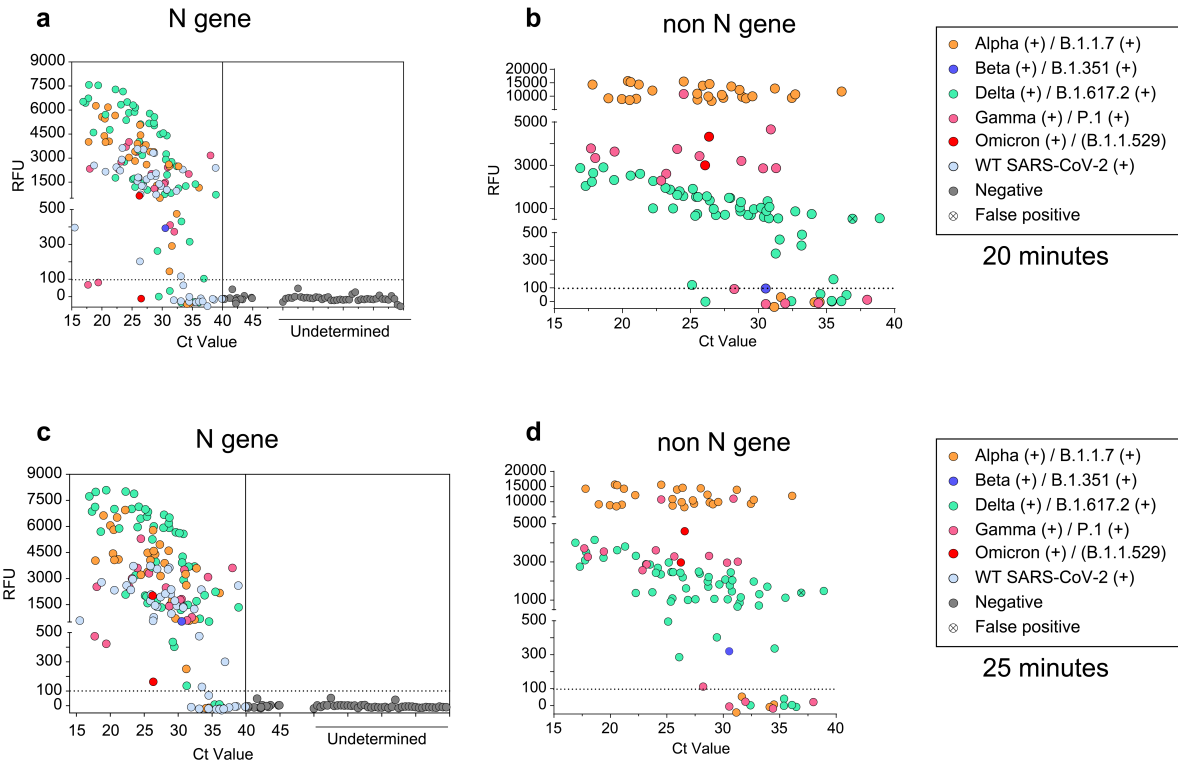

**Figure S7. Clinical validation of one-pot BrCa12b detection assay (supplement to figure 2 in the main text).** (a) and (b) One-pot patient sample detection with fluorescence measurements taken at  $t = 20$  minutes. (c) and (d) The same assay as in (a) and (b) but at  $t = 25$  minutes. The N gene target indicates the presence of SARS-CoV-2 while non-N gene targets indicates detection of variants.

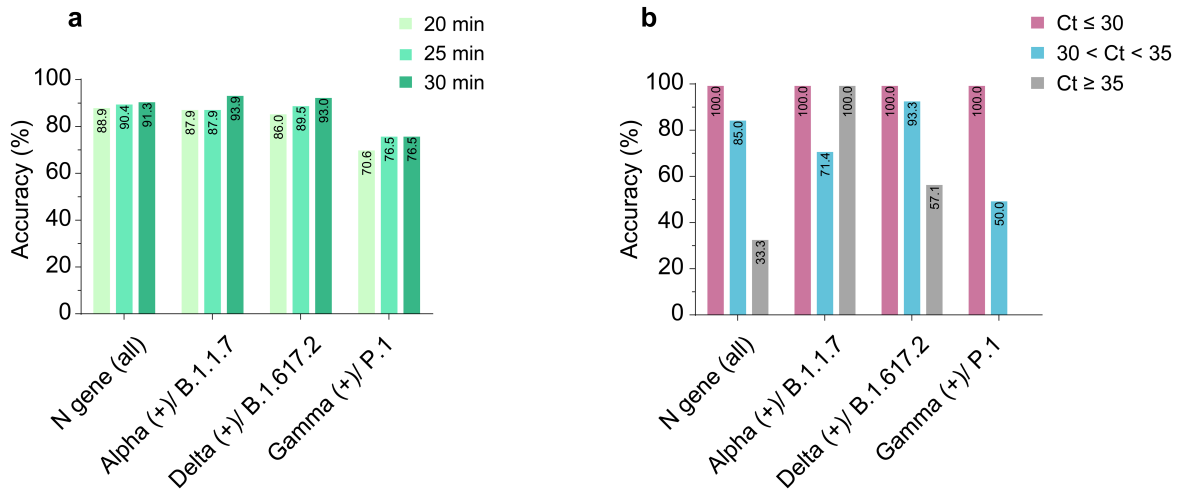

**Figure S8. Percent accuracy of patient sample validation.** (a) Percent accuracy of variant detection with respect to time. (b) Percent accuracy of variant detection with respect to Ct values.

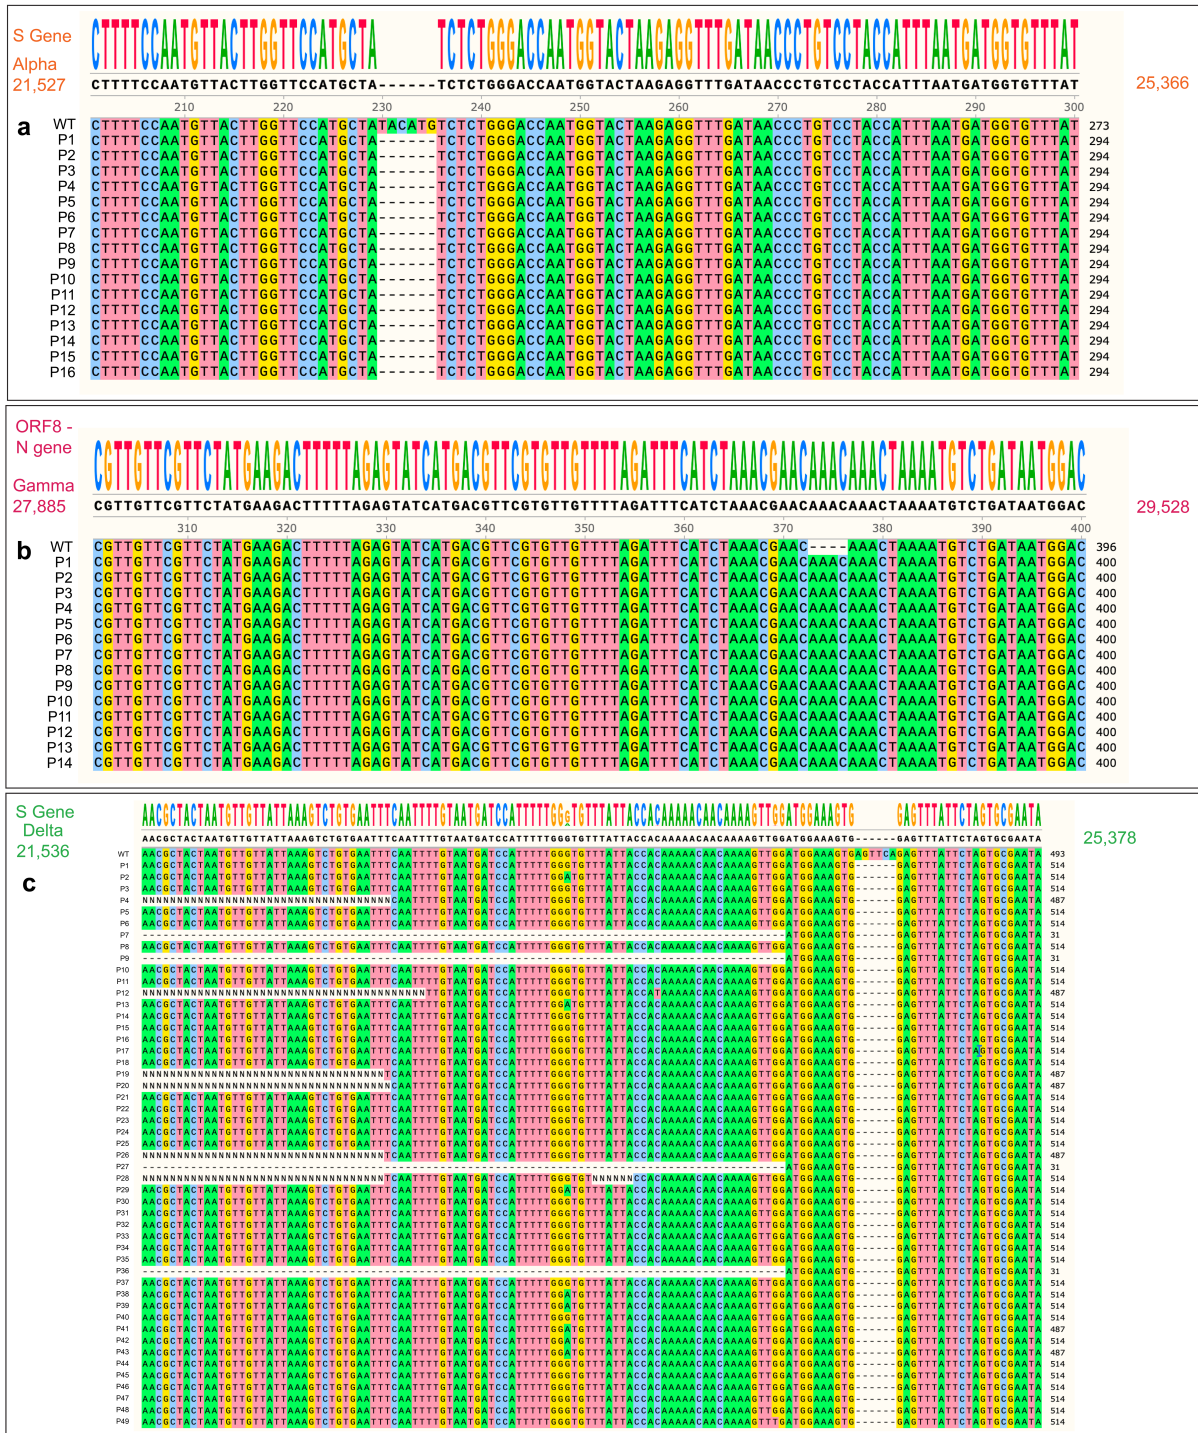

**Figure S9. Sequence alignment of patient samples in reference to wild-type SARS-CoV-2 genomic RNA.** Samples were confirmed through sequencing to identify SARS-CoV-2 variants. (a) Alpha. (b) Gamma. (c) Delta. “P” represents a sample. Sequences were imported into Snappgene and aligned with Clustal Omega(3, 4).

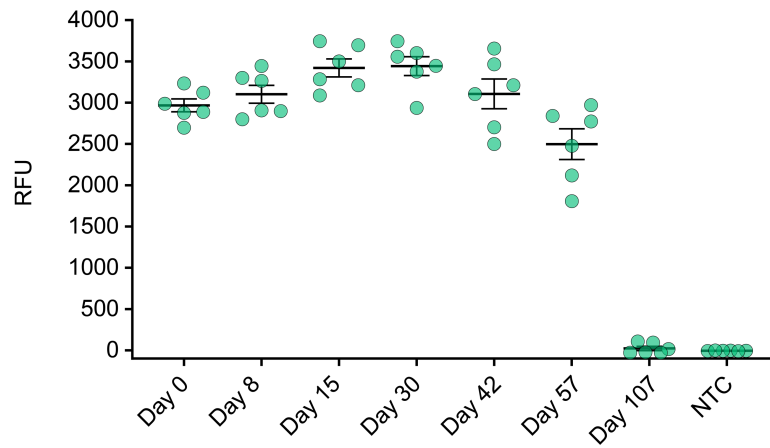

**Figure S10. Stability test of the lyophilized BrCas12b-based one-pot detection reagents.** Due to involvement of multiple proteins in the reagent, it was kept at 4°C prior to testing. The fluorescence signals were taken at t = 60 minutes, (n = 6 technical replicates).

**Table S1. Clinical characteristics of SPADE with S gene in 30 minutes**

|              | Sensitivity (%) |      |      |      | Specificity (%) |      |      |      | Accuracy (%) |      |      |     | PPV  |      |      |      | NPV  |      |      |      |
|--------------|-----------------|------|------|------|-----------------|------|------|------|--------------|------|------|-----|------|------|------|------|------|------|------|------|
|              | < 30            | < 35 | < 40 | > 40 | < 30            | < 35 | < 40 | > 40 | < 30         | < 35 | < 40 | >40 | < 30 | < 35 | < 40 | > 40 | < 30 | < 35 | < 40 | > 40 |
| $\alpha$     | 100             | 93.8 | 93.9 | ..   | 100             | 100  | 100  | 100  | 100          | 96.2 | 96.8 | 100 | 100  | 100  | 100  | ..   | 100  | 90.9 | 93.5 | 100  |
| $\beta$      | ..              | 100  | 100  | ..   | 100             | 100  | 100  | 100  | 100          | 100  | 100  | 100 | ..   | 100  | 100  | ..   | 100  | 100  | 100  | 100  |
| $\gamma$     | 100             | 81.3 | 76.5 | ..   | 100             | 100  | 100  | 100  | 100          | 93.8 | 93.2 | 100 | 100  | 100  | 100  | ..   | 100  | 91.4 | 91.3 | 100  |
| $\delta$     | 100             | 98.0 | 94.6 | ..   | 100             | 100  | 97.1 | 100  | 100          | 98.7 | 95.6 | 100 | 100  | 100  | 98.1 | ..   | 100  | 96.3 | 91.7 | 100  |
| $\sigma$     | 100             | 100  | 100  | ..   | ..              | ..   | ..   | ..   | 100          | 100  | 100  | ..  | 100  | 100  | 100  | ..   | ..   | ..   | ..   | ..   |
| <b>Other</b> | 100             | 100  | 100  | ..   | 100             | 100  | 100  | 100  | 100          | 100  | 100  | 100 | 100  | 100  | 100  | ..   | 100  | 100  | 100  | 100  |
| <b>Total</b> | 100             | 94.5 | 92.7 | ..   | 100             | 100  | 99.4 | 100  | 100          | 97.6 | 96.7 | 100 | 100  | 100  | 99.1 | ..   | 100  | 95.8 | 95.1 | 100  |

**Table S2. Portable multiplexing detection device (FISSH) specifications**

**Dichroic Beam Splitter (Mirror) 1 (close to both LEDs on the scheme)**

| Specification     | Value                         |
|-------------------|-------------------------------|
| Reflection Band   | $R_{avg} > 98\%$ 350 – 585 nm |
| Transmission Band | $T_{avg} > 93\%$ 601 – 950 nm |

**Dichroic Beam Splitter (Mirror) 1 (close to sensor and sample)**

|                     |                                   |
|---------------------|-----------------------------------|
| Reflection Band 1   | $R_{abs} > 94\%$ 471 – 491 nm     |
| Reflection Band 2   | $R_{abs} > 94\%$ 541.5 – 544.5 nm |
| Reflection Band 3   | $R_{abs} > 94\%$ 632.8 – 647.1 nm |
| Transmission Band 1 | $T_{avg} > 93\%$ 503.5 – 526.5 nm |
| Transmission Band 2 | $T_{avg} > 93\%$ 560 – 615.5 nm   |
| Transmission Band 3 | $T_{avg} > 93\%$ 665.5 – 800 nm   |

**Excitation Filter**

|                                |                                 |
|--------------------------------|---------------------------------|
| Transmission Band 1            | $T_{avg} > 85\%$ 352 – 404 nm   |
| Center Wavelength 1            | 377.5 nm                        |
| Guaranteed Minimum Bandwidth 1 | 52 nm                           |
| FWHM Bandwidth 1 (nominal)     | 57.3 nm                         |
| Transmission Band 2            | $T_{avg} > 93\%$ 461 – 487.5 nm |
| Center Wavelength 2            | 474.1 nm                        |
| Guaranteed Minimum Bandwidth 2 | 26.5 nm                         |
| FWHM Bandwidth 2 (nominal)     | 30.1 nm                         |
| Transmission Band 3            | $T_{avg} > 93\%$ 543 – 566 nm   |
| Center Wavelength 3            | 554.5 nm                        |
| Guaranteed Minimum Bandwidth 3 | 23 nm                           |
| FWHM Bandwidth 3 (nominal)     | 27.6 nm                         |
| Transmission Band 4            | $T_{avg} > 93\%$ 626 – 644 nm   |
| Center Wavelength 4            | 635 nm                          |
| Guaranteed Minimum Bandwidth 4 | 18 nm                           |

|                            |         |
|----------------------------|---------|
| FWHM Bandwidth 4 (nominal) | 22.9 nm |
|----------------------------|---------|

### Emission Filter

|                                |                                       |
|--------------------------------|---------------------------------------|
| Transmission Band 1            | T <sub>avg</sub> > 93% 414 – 450 nm   |
| Center Wavelength 1            | 432 nm                                |
| Guaranteed Minimum Bandwidth 1 | 36 nm                                 |
| FWHM Bandwidth 1 (nominal)     | 39.7 nm                               |
| Transmission Band 2            | T <sub>avg</sub> > 93% 499.5 – 530 nm |
| Center Wavelength 2            | 514.8 nm                              |
| Guaranteed Minimum Bandwidth 2 | 30.5 nm                               |
| FWHM Bandwidth 2 (nominal)     | 35.5 nm                               |
| Transmission Band 3            | T <sub>avg</sub> > 93% 580 – 611 nm   |
| Center Wavelength 3            | 595.5 nm                              |
| Guaranteed Minimum Bandwidth 3 | 31 nm                                 |
| FWHM Bandwidth 3 (nominal)     | 36.2 nm                               |
| Transmission Band 4            | T <sub>avg</sub> > 93% 661 – 800 nm   |
| Center Wavelength 4            | 730.5 nm                              |
| Guaranteed Minimum Bandwidth 4 | 139 nm                                |
| FWHM Bandwidth 4 (nominal)     | 147.2 nm                              |

**Table S3. Sequences used in the study**

#### 3.1. RT-LAMP Primers

| Primer target                              | Primer name         | Sequence                                        | 1X Concentration                               |        |
|--------------------------------------------|---------------------|-------------------------------------------------|------------------------------------------------|--------|
| <b>N gene (for presence of SARS-CoV-2)</b> | N_F3                | AACACAAGCTTTTCGGCAG                             | 0.2 µM                                         |        |
|                                            | N_B3                | GAAATTTGGATCTTTGTCATCC                          | 0.2 µM                                         |        |
|                                            | N_FIP               | TGCGGCCAATGTTTGTAAATCAGCCAA<br>GGAA ATTTTGGGGAC | 1.6 µM                                         |        |
|                                            | N_BIP               | CGCATTGGCATGGAAGTCACTTTGAT<br>GGC ACCTGTGTAG    | 1.6 µM                                         |        |
|                                            | <b>62°C RT-LAMP</b> | N_LF                                            | TTCCTTGTCTGATTAGTTC                            | 0.8 µM |
|                                            |                     | N_LB                                            | ACCTTCGGGAACGTGGTT                             | 0.8 µM |
| <b>Alpha (B.1.1.7)</b>                     | Alpha_F3            | ATACACTAATTCTTTCACACGT                          | 0.2 µM                                         |        |
|                                            | Alpha_B3            | CCTCTTATTATGTTAGACTTCTCAG                       | 0.2 µM                                         |        |
|                                            | Alpha_FIP           | GGAAAAGAAAGGTAAGAACAACCCTG<br>ACAAAGTTTTTCAGAT  | 1.6 µM                                         |        |
|                                            | <b>62°C RT-LAMP</b> | Alpha_BIP                                       | ATGGTACTAAGAGGTTTTGATTGGAAG<br>CAAATAAACACCATC | 1.6 µM |
|                                            |                     | Alpha_LF                                        | CCTGAGTTGAATGTAAAACCTGAGG                      | 0.8 µM |
|                                            | Alpha_LB            | AACCCTGTCCTACCATTAA                             | 0.8 µM                                         |        |
| <b>Beta (B.1.351)</b>                      | Beta_F3             | ACACGCCTATTAATTTAGTGC                           | 0.4 µM                                         |        |
|                                            | Beta_B3             | TAGAAAAGTCCTAGGTTGAAGA                          | 0.4 µM                                         |        |

|                                                   |             |                                                       |        |
|---------------------------------------------------|-------------|-------------------------------------------------------|--------|
| <b>62°C RT-LAMP</b>                               | Beta_FIP    | CCTAGTGATGTTAATACCTATTGGCTC<br>CCTCAGGGTTTTTCG        | 1.6 µM |
|                                                   | Beta_BIP    | AAGTTATTTGACTCCTGGTCATAATAA<br>GCTGCAGCACC            | 1.6 µM |
|                                                   | Beta_LF     | CAAATCTACCAATGGTTCTAAAGC                              | 0.8 µM |
|                                                   | Beta_LB     | GATTCTTCTTCAGGTTGGACAGC                               | 0.8 µM |
| <b>Delta (B.1.617.2)</b><br><b>62°C RT-LAMP</b>   | Delta_F3    | CCCTACTTATTGTTAATAACGCT                               | 0.4 µM |
|                                                   | Delta_B3    | ATTCTTAAACACAAATTCCTAAG                               | 0.4 µM |
|                                                   | Delta_FIP   | TTTTTGTGGTAATAAACACCCAAAAAC<br>TAATGTTGTTATTAAGTCTGTG | 1.6 µM |
|                                                   | Delta_BIP   | CTAGTGCGAATAATTGCACTTTTGATG<br>TTTTCTTCAAGGTCCAT      | 1.6 µM |
|                                                   | Delta_LF    | ATGGATCATTACAAAATTGAAA                                | 0.8 µM |
|                                                   | Delta_LB    | ATATGTCTCTCAGCCTTTTCTT                                | 0.8 µM |
| <b>Gamma (P.1)</b><br><b>62°C RT-LAMP</b>         | Gamma_F3    | CAATTAATTGCCAGGAACCTAA                                | 0.2 µM |
|                                                   | Gamma_B3    | TACTGCCAGTTGAATCTGA                                   | 0.2 µM |
|                                                   | Gamma_FIP   | CAACACGAACGTCATGATACTCTAAG<br>GGTAGTCTTGTAGTG         | 1.6 µM |
|                                                   | Gamma_BIP   | ACTAAAATGTCTGATAATGGACCCCG<br>GGTCCACCAAACGTAAT       | 1.6 µM |
|                                                   | Gamma_LF    | AAAGTCTTCATAGAACGAACAA                                | 0.8 µM |
|                                                   | Gamma_LB    | AAAATCAGCGAAATGCACCCC                                 | 0.8 µM |
| <b>Omicron (B.1.1.529)</b><br><b>60°C RT-LAMP</b> | Omicron_F3  | ACTTTAGATTTCGAAGACCCA                                 | 0.4 µM |
|                                                   | Omicron_B3  | AGAAAAGGCTGAGAGACAT                                   | 0.4 µM |
|                                                   | Omicron_FIP | TCATTACAAAATTGAAATTCACAGTCC<br>CTACTTATTGTTAATAACGC   | 1.6 µM |
|                                                   | Omicron_BIP | AACAACAAAAGTTGGATGGAAAGAAAA<br>GTGCAATTATTTCGCACTAG   | 1.6 µM |
|                                                   | Omicron_LF  | GACTTTAATAACAACATTAGTA                                | 0.8 µM |
|                                                   | Omicron_LB  | AGTGAGTTCAGAGTTTATTC                                  | 0.8 µM |
| <b>RNase P</b><br><b>62°C RT-LAMP</b>             | RNaseP_F3   | TTGATGAGCTGGAGCCA                                     | 0.2 µM |
|                                                   | RNaseP_B3   | CACCCTCAATGCAGAGTC                                    | 0.2 µM |
|                                                   | RNaseP_FIP  | GTGTGACCCTGAAGACTCGGTTTTAG<br>CCA CTGACTCGGATC        | 1.6 µM |
|                                                   | RNaseP_BIP  | CCTCCGTGATATGGCTCTTCGTTTTT<br>TCTT ACATGGCTCTGGTC     | 1.6 µM |
|                                                   | RNaseP_LF   | ATGTGGATGGCTGAGTTGTT                                  | 0.8 µM |
|                                                   | RNaseP_LB   | CATGCTGAGTACTGGACCTC                                  | 0.8 µM |

### 3.2. Single-guide RNA (sgRNA)

| Target                              | Sequence                                                                                                                                                           |
|-------------------------------------|--------------------------------------------------------------------------------------------------------------------------------------------------------------------|
| N gene (for presence of SARS-CoV-2) | GAAGGUGGUUAGCUACAGGCUGACCAGUGCAGUUGUGUC<br>AUGUGCUACGGUGACCUAACACGUCACUCAGUCACAACGG<br>CUAUCUAUAUUUCCACUAACCAAAGUUAGUGGAAAUGUAG<br>AUGGUUAGCACCGAAGAACGCUGAAGCGCUG |
| Alpha (B.1.1.7)                     | GAAGGUGGUUAGCUACAGGCUGACCAGUGCAGUUGUGUC<br>AUGUGCUACGGUGACCUAACACGUCACUCAGUCACAACGG                                                                                |

|                                       |                                                                                                                                                                             |
|---------------------------------------|-----------------------------------------------------------------------------------------------------------------------------------------------------------------------------|
|                                       | CUAUCUAUAUUUCCACUAACCAAAGUUAGUGGAAAUGUAG<br>AUGGUUAGCAC <u>GUUCCAUGCUAUCUCUGGGA</u>                                                                                         |
| Beta (B.1.352)                        | GAAGGUGGUUAGCUACAGGCUGACCAGUGCAGUUGUGUC<br>AUGUGCUCACGGUGACCUAACACGUCACUCAGUCACAACGG<br>CUAUCUAUAUUUCCACUAACCAAAGUUAGUGGAAAUGUAG<br>AUGGUUAGCAC <u>UAUGUAAAGUUUGAAACCUA</u> |
| Delta (B.1.617.2)                     | GAAGGUGGUUAGCUACAGGCUGACCAGUGCAGUUGUGUC<br>AUGUGCUCACGGUGACCUAACACGUCACUCAGUCACAACGG<br>CUAUCUAUAUUUCCACUAACCAAAGUUAGUGGAAAUGUAG<br>AUGGUUAGCAC <u>GAUGGAAAGUGGAGUUUAUU</u> |
| Gamma (P1)                            | GAAGGUGGUUAGCUACAGGCUGACCAGUGCAGUUGUGUC<br>AUGUGCUCACGGUGACCUAACACGUCACUCAGUCACAACGG<br>CUAUCUAUAUUUCCACUAACCAAAGUUAGUGGAAAUGUAG<br>AUGGUUAGCAC <u>GUUUGUUUGUUCGUUUAGAU</u> |
| Omicron (B.1.1.529)                   | GAAGGUGGUUAGCUACAGGCUGACCAGUGCAGUUGUGUC<br>AUGUGCUCACGGUGACCUAACACGUCACUCAGUCACAACGG<br>CUAUCUAUAUUUCCACUAACCAAAGUUAGUGGAAAUGUAG<br>AUGGUUAGCAC <u>UGGUCCAAAAUGGAUCAUU</u>  |
| RNase P                               | GAAGGUGGUUAGCUACAGGCUGACCAGUGCAGUUGUGUC<br>AUGUGCUCACGGUGACCUAACACGUCACUCAGUCACAACGG<br>CUAUCUAUAUUUCCACUAACCAAAGUUAGUGGAAAUGUAG<br>AUGGUUAGCAC <u>AAUUACUUGGGUGUGACCCU</u> |
| sgGFP (for Michaelis-Menten Kinetics) | GAAGGUGGUUAGCUACAGGCUGACCAGUGCAGUUGUGUC<br>AUGUGCUCACGGUGACCUAACACGUCACUCAGUCACAACGG<br>CUAUCUAUAUUUCCACUAACCAAAGUUAGUGGAAAUGUAG<br>AUGGUUAGCAC <u>CUCAGGGCGGACUGGGUGCU</u> |

### 3.3. Reporters

| Reporter name | Sequence                 |
|---------------|--------------------------|
| Reporter 1    | /5HEX/TTTTTTTT/3IABkFQ/  |
| Reporter 2    | /5HEX/TTTTTTTT           |
| Reporter 3    | /56FAM/TTATT/3IABkFQ/    |
| Reporter 4    | /56FAM/TTTTTTTT/3IABkFQ/ |
| Reporter 5    | 5Cy5/TTTTTTTT/3BHQ_2/    |

### 3.5. Oligos

| Name                                       | Sequence                                     |
|--------------------------------------------|----------------------------------------------|
| Act_GFP_T (for Michaelis-Menten Kinetics)  | CCACTACCTGAGCACCCAGTCCGCCCTGAGCAAAGACC<br>CC |
| Act_GFP_NT (for Michaelis-Menten Kinetics) | GGGGTCTTTGCTCAGGGCGGACTGGGTGCTCAGGTAG<br>TGG |

### 3.5. Protein Sequences



| Name      | Sequence                                                                                                                                                                                                                                                                                                                                                                                                                                                                                                                                                                                                                                                                                                                                                                                                                                                                                                                                                                                                                                                                                                                                                                                                                                                      |
|-----------|---------------------------------------------------------------------------------------------------------------------------------------------------------------------------------------------------------------------------------------------------------------------------------------------------------------------------------------------------------------------------------------------------------------------------------------------------------------------------------------------------------------------------------------------------------------------------------------------------------------------------------------------------------------------------------------------------------------------------------------------------------------------------------------------------------------------------------------------------------------------------------------------------------------------------------------------------------------------------------------------------------------------------------------------------------------------------------------------------------------------------------------------------------------------------------------------------------------------------------------------------------------|
| AacCas12b | MAVKSIVKLRRLDDMPEIRAGLWKLHKEVNAGVRYYTEWLSLLRQENLYR<br>RSPNGDGEQECDKTAECKAELLERLRARQVENGHHRGPAGSDDELLQLA<br>RQLYELLVPQAIGAKGDAQIARKFLSPLADKDAVGGGLGIAKAGNKPRWV<br>RMREAGEPGWEEKEKAETRKSADRTADVLRALADFGFLKPLMRVYTDSE<br>MSSVEWKPLRKGQAVRTWDRDMFQQAIERMMSWESWNQRVGQEYAKL<br>VEQKNRFEQKNFVQGEHLVHLVNQLQQDMKEASPGLESKEQTAHYVTGR<br>ALRGSDKVFEEKWGLAPDAPFDLYDAEIKNVQRRNTRRFSGHDLFAKLAE<br>PEYQALWREDASFLTRYAVYNSILRKLNHAKMFATFTLPDATAHPIWTRFD<br>KLGGNLHQYTFLFNEFGERRHAIRFHKLLKVENGVAEVDVTVPIISMSE<br>QLDNLPRDPNEPIALYFRDYGAEQHFTGEFGGAKIQCRDQLAHMHRRR<br>GARDVYLNVSVRVQSQSEARGERRPPYAAVFRLVGDNHRAFVHFDKLS<br>YLAHPDDGKLGSEGLLSGLRVMSVDLGLRTSASISVFRVARKDELKPNS<br>KGRVPPFFPIKGNLNVAVHERSOLLKLPGETESKDLRAIREERQRTLRL<br>RTQLAYLRLLVRCGSEDVGRRERSWAKLIEQPVDAAHMTDPDWREAFEN<br>ELQKLKSLHGICSDKEWMDAVYESVRRVWRHMGKQVRDWRKDVRSGER<br>PKIRGYAKDVVGGNSIEQIEYLERQYKFLKSWSSFFGKVSGQVIRAEKGSRF<br>AITLREHIDHAKEDRLKKLADRIIMEALGYVYALDERGKGGKWWAKYPPCQLI<br>LLEELSEYQFNDRPPSENNQLMQWSHRGVFQELINQAQVHDLVGTMY<br>AAFSSRFDARTGAPGIRCRRVPARCTQEHNPEPPFWLNFVVEHTLDA<br>CPLRADDLIPTGEGEIFVSPFSAEEGDFHQIHADLNAAQNLQQRLWSDFDI<br>SQIRLRCDWGEVDGELVLIPRLTGKRTADSYSNKVFYTTNTGVTYERER<br>KKRRKVFAQEKLSEEEAELLVEADEAREKSVVLMRDPGSIINRGNWTRQK<br>EFWSMVNQRIEGLYLVKQIRSRVPLQDSACENTGDI      |
| AapCas12b | MAVKSMKVKLRRLDNMPEIRAGLWKLHTEVNAGVRYYTEWLSLLRQENLY<br>RRSPNGDGEQECYKTAEECKAELLERLRARQVENGHHRGPAGSDDELLQL<br>ARQLYELLVPQAIGAKGDAQIARKFLSPLADKDAVGGGLGIAKAGNKPRW<br>VRMREAGEPGWEEKAKAEARKSTDRTADVLRALADFGFLKPLMRVYTD<br>DMSSVQWKPLRKGQAVRTWDRDMFQQAIERMMSWESWNQRVGEAYAK<br>LVEQKSRFEQKNFVQGEHLVQLVNQLQQDMKEASHGLESKEQTAHYLTG<br>RALRGSDKVFEEKWEKLDPAFDLYDTEIKNVQRRNTRRFSGHDLFAKLA<br>EPKYQALWREDASFLTRYAVYNSIVRKLNHAKMFATFTLPDATAHPIWTRF<br>DKLGGNLHQYTFLFNEFGEGRHAIRFQKLLTVEDGVAKEVDVTVPISMSA<br>QLDDLLPRDPHELVALYFQDYGAEQHLAGEFGGAKIQYRRDQLNHLHARR<br>GARDVYLNLSVRVQSQSEARGERRPPYAAVFRLVGDNHRAFVHFDKLS<br>YLAHPDDGKLGSEGLLSGLRVMSVDLGLRTSASISVFRVARKDELKPNS<br>EGRVPPFCFPIEGNENLVAVHERSOLLKLPGETESKDLRAIREERQRTLRL<br>RTQLAYLRLLVRCGSEDVGRRERSWAKLIEQPM DANQMTDPDWREAFED<br>LQKLKSLYGICGDREWTEAVYESVRRVWRHMGKQVRDWRKDVRSGERP<br>KIRGYQKDVVGGNSIEQIEYLERQYKFLKSWSSFFGKVSGQVIRAEKGSRFA<br>ITLREHIDHAKEDRLKKLADRIIMEALGYVYALDDERGKGGKWWAKYPPCQLI<br>LLEELSEYQFNDRPPSENNQLMQWSHRGVFQELNQAQVHDLVGTMY<br>AAFSSRFDARTGAPGIRCRRVPARCAREQNPEPPFWLNFVVAEHKLDG<br>CPLRADDLIPTGEGEFFVSPFSAEEGDFHQIHADLNAAQNLQRRRLWSDFDI<br>SQIRLRCDWGEVDGEPVLIPRTTGKRTADSYGNKVFYTKTGVTYERER<br>KKRRKVFAQEELSEEEAELLVEADEAREKSVVLMRDPGSIINRGDWTRQK<br>EFWSMVNQRIEGLYLVKQIRSRVRLQESACENTGDI |

|          |                                                                                                                                                                                                                                                                                                                                                                                                                                                                                                                                                                                                                                                                                                                                                                                                                                                                                                                                                                                                                                                                                                                                                                                                                            |
|----------|----------------------------------------------------------------------------------------------------------------------------------------------------------------------------------------------------------------------------------------------------------------------------------------------------------------------------------------------------------------------------------------------------------------------------------------------------------------------------------------------------------------------------------------------------------------------------------------------------------------------------------------------------------------------------------------------------------------------------------------------------------------------------------------------------------------------------------------------------------------------------------------------------------------------------------------------------------------------------------------------------------------------------------------------------------------------------------------------------------------------------------------------------------------------------------------------------------------------------|
| BrCas12b | MPVRSFKVCLVTRSGDAEHMLQLRRGLWKTHEIVNQGIAYYMNKLALMR<br>QEPYAGKSREVVRLLELLHSLRAQQKRNNWTGDAGTDDEILNLSRRLYELL<br>VPSAIGEKGDAQMLSRKFLSPLVDPNSEGGKGTAKSGRKPRWMKMREE<br>GHPDWEAEREKDRAKKAADPTASILNDLEAFGLRPLFPLFTDEQKGIQWL<br>PKQKRQFVRTFDRDMFQQALERMLSWESWNRRAEEYQKLQAQRDELY<br>AKYLADGGAWLEALQSFEKQREVELAEESFAAKSEYLITRRQIRGWKQVY<br>EKWSQLPEHAAQEQQFWQVADVQTSPLPGAFGDPKVVYQFLSQPEHHIHW<br>RGYPNRLFHYSDYNGVRKKLQRRARHDATFTLPDPVEHPLWIRFDARGGNI<br>HDYEISQNGKQYQVTFSRLLWPENETWVERENVTVAIGASQQLKRQIRLD<br>GYADKKQKVRYRDYSSGIELTGVLGGAQIQFDRRHLRKASNRLADGETGP<br>VYLNVVVDIEPFLAMRNGRLQTPIGQVLQVNTKDWPKVTGYKPAELISWIQ<br>NSPLAVGTGVNTIEAGMRVMSVDLGGQRSAAAVSIFEVMRQKPAEQETKLF<br>YPIAVTGLYAVHRRSLLLRLPGEKISDEIEQQRKIRAHARSLVRYQIRLLADV<br>LRLHTRGTAEQRRAKLDELLATLQTKQELDQKLWQTELEKLFDYIHEPAER<br>WQQALVAHRTLEPVIQAVRHWRKSLRIDRKGLAGMSMWNIIEELEETR<br>KLLIAWSKHSRVPGEPNRLDKEETFAPQQLQHIQNVKDDRLKQMANLLVM<br>TALGYKYDEAEKQWKEAYPACQMILFEDLSRYRFALDRPRRENRLMKW<br>AHRIPRLVYLQGELFGIQVGDVYSAYTSRFHAKTGAPGIRCHALKEEDLQ<br>PNSYVVKQLIKDGFIREDDTGSCLKPGQIVPWSGGELFVTLADRSGSRLAVI<br>HADINAAQNLQKRFWQQNTEIFRVPCKVTTSGLIPAYDKMKKLFKGYFA<br>KINQTDTSEVYVWEHSAKMKGKTTAPDPAEEGVFDES LTD EMEELED SQ<br>EGYKTLFRDPSGFFWSSDRWLPQKEFWFWVKRRIEKKLREQLQ |
|----------|----------------------------------------------------------------------------------------------------------------------------------------------------------------------------------------------------------------------------------------------------------------------------------------------------------------------------------------------------------------------------------------------------------------------------------------------------------------------------------------------------------------------------------------------------------------------------------------------------------------------------------------------------------------------------------------------------------------------------------------------------------------------------------------------------------------------------------------------------------------------------------------------------------------------------------------------------------------------------------------------------------------------------------------------------------------------------------------------------------------------------------------------------------------------------------------------------------------------------|

**Table S4. GISAID information for clinical samples**

| <b>Virus name</b>                    | <b>Accession ID</b> | <b>Lineage</b> |
|--------------------------------------|---------------------|----------------|
| hCoV-19/USA/FL-Path-Saliva-705b/2021 | EPI_ISL_3655932     | AY.119         |
| hCoV-19/USA/FL-Path-Saliva-707b/2021 | EPI_ISL_3655934     | AY.26          |
| hCoV-19/USA/FL-Path-Saliva-709b/2021 | EPI_ISL_3655936     | AY.44          |
| hCoV-19/USA/FL-Path-Saliva-746b/2021 | EPI_ISL_3655964     | AY.3.1         |
| hCoV-19/USA/FL-Path-Saliva-747b/2021 | EPI_ISL_3655965     | AY.25.1        |
| hCoV-19/USA/FL-Path-Saliva-749b/2021 | EPI_ISL_3655967     | AY.47          |
| hCoV-19/USA/FL-Path-Saliva-750b/2021 | EPI_ISL_3655968     | B.1.617.2      |
| hCoV-19/USA/FL-Path-Saliva-752b/2021 | EPI_ISL_3655969     | AY.47          |
| hCoV-19/USA/FL-Path-Saliva-753b/2021 | EPI_ISL_3655970     | AY.75          |
| hCoV-19/USA/FL-Path-Saliva-755b/2021 | EPI_ISL_3655971     | AY.3           |
| hCoV-19/USA/FL-Path-Saliva-756b/2021 | EPI_ISL_3655972     | B.1.617.2      |
| hCoV-19/USA/FL-Path-Saliva-758b/2021 | EPI_ISL_3655974     | AY.3           |
| hCoV-19/USA/FL-Path-Saliva-759b/2021 | EPI_ISL_3655975     | AY.103         |
| hCoV-19/USA/FL-Path-Saliva-760b/2021 | EPI_ISL_3655976     | AY.110         |
| hCoV-19/USA/FL-Path-Saliva-761b/2021 | EPI_ISL_3655977     | AY.25          |
| hCoV-19/USA/FL-Path-Saliva-763b/2021 | EPI_ISL_3655978     | B.1.617.2      |
| hCoV-19/USA/FL-Path-Saliva-764b/2021 | EPI_ISL_3655979     | AY.44          |
| hCoV-19/USA/FL-Path-Saliva-765b/2021 | EPI_ISL_3655980     | AY.110         |
| hCoV-19/USA/FL-Path-Saliva-767b/2021 | EPI_ISL_3655981     | AY.119         |

|                                       |                 |           |
|---------------------------------------|-----------------|-----------|
| hCoV-19/USA/FL-Path-Saliva-768b/2021  | EPI_ISL_3655982 | AY.110    |
| hCoV-19/USA/FL-Path-Saliva-769b/2021  | EPI_ISL_3655983 | AY.110    |
| hCoV-19/USA/FL-Path-Saliva-770b/2021  | EPI_ISL_3655984 | AY.47     |
| hCoV-19/USA/FL-Path-Saliva-771b/2021  | EPI_ISL_3655985 | AY.103    |
| hCoV-19/USA/FL-Path-Saliva-772b/2021  | EPI_ISL_3655986 | AY.119    |
| hCoV-19/USA/FL-Path-Saliva-773b/2021  | EPI_ISL_3655987 | AY.47     |
| hCoV-19/USA/FL-Path-Saliva-774b/2021  | EPI_ISL_3655988 | AY.103    |
| hCoV-19/USA/FL-Path-Saliva-776b/2021  | EPI_ISL_3655989 | B.1.617.2 |
| hCoV-19/USA/FL-Path-Saliva-777b/2021  | EPI_ISL_3655990 | B.1.617.2 |
| hCoV-19/USA/FL-Path-Saliva-778b/2021  | EPI_ISL_3655991 | AY.44     |
| hCoV-19/USA/FL-Path-Saliva-779b/2021  | EPI_ISL_3655992 | AY.113    |
| hCoV-19/USA/FL-Path-Saliva-780b/2021  | EPI_ISL_3655993 | AY.110    |
| hCoV-19/USA/FL-Path-Saliva-781b/2021  | EPI_ISL_3655994 | AY.122    |
| hCoV-19/USA/FL-Path-Saliva-793b/2021  | EPI_ISL_3656005 | AY.3      |
| hCoV-19/USA/FL-Path-Saliva-1296/2021  | EPI_ISL_3656270 | AY.47     |
| hCoV-19/USA/FL-Shands-VTM-2422/2021   | EPI_ISL_3657454 | AY.114    |
| hCoV-19/USA/FL-Shands-VTM-2442/2021   | EPI_ISL_3657471 | AY.47     |
| hCoV-19/USA/FL-Shands-VTM-2444/2021   | EPI_ISL_3657472 | AY.110    |
| hCoV-19/USA/FL-Shands-VTM-2451/2021   | EPI_ISL_3657478 | AY.47     |
| hCoV-19/USA/FL-Shands-VTM-2452/2021   | EPI_ISL_3657479 | AY.47     |
| hCoV-19/USA/FL-Shands-VTM-2455/2021   | EPI_ISL_3657481 | AY.3.1    |
| hCoV-19/USA/FL-Shands-VTM-2456/2021   | EPI_ISL_3657482 | AY.47     |
| hCoV-19/USA/FL-Shands-VTM-2459/2021   | EPI_ISL_3657485 | AY.3      |
| hCoV-19/USA/FL-Shands-VTM-2460/2021   | EPI_ISL_3657486 | AY.47     |
| hCoV-19/USA/FL-Path-Saliva-757b/2021  | EPI_ISL_3655973 | None      |
| hCoV-19/USA/FL-Path-Saliva-845b/2021  | EPI_ISL_3656039 | B.1       |
| hCoV-19/USA/FL-Path-Saliva-1066b/2021 | EPI_ISL_3656155 | B.1.1.7   |
| hCoV-19/USA/FL-Path-Saliva-1067b/2021 | EPI_ISL_3656156 | B.1.1.7   |
| hCoV-19/USA/FL-Path-Saliva-1068b/2021 | EPI_ISL_3656157 | B.1.1.7   |
| hCoV-19/USA/FL-Path-Saliva-1070b/2021 | EPI_ISL_3656158 | B.1.1.7   |
| hCoV-19/USA/FL-Path-Saliva-1071b/2021 | EPI_ISL_3656159 | B.1.1.519 |
| hCoV-19/USA/FL-Path-Saliva-1074b/2021 | EPI_ISL_3656160 | B.1.1     |
| hCoV-19/USA/FL-Path-Saliva-1075b/2021 | EPI_ISL_3656161 | B.1.1.7   |
| hCoV-19/USA/FL-Path-Saliva-1077b/2021 | EPI_ISL_3656162 | B.1.1.7   |
| hCoV-19/USA/FL-Path-Saliva-1078b/2021 | EPI_ISL_3656163 | B.1.1.7   |
| hCoV-19/USA/FL-Path-Saliva-1080b/2021 | EPI_ISL_3656165 | B.1.1.7   |
| hCoV-19/USA/FL-Path-Saliva-1084b/2021 | EPI_ISL_3656168 | B.1.1.7   |
| hCoV-19/USA/FL-Path-Saliva-1088b/2021 | EPI_ISL_3656171 | B.1.1.7   |
| hCoV-19/USA/FL-Path-Saliva-1091b/2021 | EPI_ISL_3656173 | B.1.526   |
| hCoV-19/USA/FL-Path-Saliva-1092b/2021 | EPI_ISL_3656174 | AY.47     |
| hCoV-19/USA/FL-Path-Saliva-1285/2021  | EPI_ISL_3656260 | P.1.10    |

|                                       |                 |         |
|---------------------------------------|-----------------|---------|
| hCoV-19/USA/FL-Path-Saliva-1286/2021  | EPI_ISL_3656261 | B.1.1.7 |
| hCoV-19/USA/FL-Path-Saliva-1287/2021  | EPI_ISL_3656262 | B.1.1.7 |
| hCoV-19/USA/FL-Path-Saliva-1288/2021  | EPI_ISL_3656263 | B.1.1.7 |
| hCoV-19/USA/FL-Path-Saliva-1289/2021  | EPI_ISL_3656264 | B.1.1.7 |
| hCoV-19/USA/FL-Path-Saliva-1290/2021  | EPI_ISL_3656265 | P.1.10  |
| hCoV-19/USA/FL-Path-Saliva-1291/2021  | EPI_ISL_3656266 | B.1.1.7 |
| hCoV-19/USA/FL-Path-Saliva-1292/2021  | EPI_ISL_3656267 | P.1.10  |
| hCoV-19/USA/FL-Path-Saliva-1293/2021  | EPI_ISL_3656268 | B.1.1.7 |
| hCoV-19/USA/FL-Path-Saliva-1294/2021  | EPI_ISL_3656269 | B.1     |
| hCoV-19/USA/FL-Path-Saliva-1090b/2021 | EPI_ISL_3656172 | B.1.575 |
| hCoV-19/USA/FL-Path-Saliva-1083b/2021 | EPI_ISL_3656167 | B.1.575 |
| hCoV-19/USA/FL-Path-Saliva-1085b/2021 | EPI_ISL_3656169 | B.1.575 |

**Table S5. Detailed Resource Information**

| <b>Resources</b>                                                         | <b>Identifier</b>        | <b>Supplier</b>         |
|--------------------------------------------------------------------------|--------------------------|-------------------------|
| <b>Plasmids</b>                                                          |                          |                         |
| pMBP-AacCas12b                                                           | Addgene plasmid # 113433 | Addgene                 |
| BPK2014-AapCas12b                                                        | Addgene plasmid # 121949 | Addgene                 |
| PET28a+_BrCas12b                                                         | Addgene plasmid # 170819 | Addgene                 |
| <b>Bacterial Strains</b>                                                 |                          |                         |
| NEB® 5-alpha Competent E. coli (High Efficiency)                         | Cat NO: C2987H           | New England Biolabs     |
| BL21(DE3) Competent E. coli                                              | Cat NO: C2527H           | New England Biolabs     |
| <b>Chemicals and Reagents</b>                                            |                          |                         |
| HiScribe™ T7 Quick High Yield RNA Synthesis Kit                          | Cat NO: E2050S           | New England Biolabs     |
| RNA Clean & Concentrator-25                                              | Cat NO: R1017            | ZYMO Research           |
| L-Proline, 99%                                                           | Cat NO: A10199           | Alfa Aesar              |
| Taurine, 99%                                                             | Cat NO: A12403           | Alfa Aesar              |
| Bovine Serum Albumin, Molecular Biology Grade                            | Cat NO: B9000S           | New England Biolabs     |
| Betaine 5M Solution, MB Grade                                            | LOT: 00955041            | ThermoFisher Scientific |
| WarmStart® Multi-Purpose LAMP/RT-LAMP 2X Master Mix (with UDG)           | Cat NO: M1708S           | New England Biolabs     |
| Lyo-ready WarmStart® Multi-Purpose LAMP/RT-LAMP 2X Master Mix (with UDG) | Under Development        | New England Biolabs     |
| SYTO™ 9                                                                  | Cat NO: S34854           | ThermoFisher Scientific |
| Lysozyme                                                                 | Cat NO: 100831           | MP Biomedicals, LLC     |

|                                                                                  |                            |                                     |
|----------------------------------------------------------------------------------|----------------------------|-------------------------------------|
| Starchyose Tetrahydrate                                                          | Cat NO: 153946             | MP Biomedicals, LLC                 |
| Deoxyribonuclease I                                                              | Cat NO: LS002145           | Worthington Biochemical Corporation |
| Phenylmethylsulfonyl Fluoride                                                    | Cat NO: 195381             | MP Biomedicals, LLC                 |
| NEBuffer™ 2.1                                                                    | Cat NO: B7202              | New England Biolabs                 |
| Sodium Dodecyl Sulfate (SDS), White Powder, Electrophoresis, Fisher BioReagents™ | Cat NO: BP166-100          | Fisher Scientific                   |
| Ethylenediaminetetraacetic Acid (0.5M Solution/pH 8.0), Fisher BioReagents       | CAT: BP2482-500            | Fisher Scientific                   |
| Glycerol (Certified ACS), Fisher Chemical™                                       | CAT: G33-1                 | Fisher Scientific                   |
| GelRed® 10,000X in water                                                         | Cat NO: 41003              | Biotium                             |
| Agarose LE (Molecular Biology Grade)                                             | Cat NO: A-201-100          | Gold Biotechnology                  |
| Protein Thermal Shift™ Dye Kit                                                   | Cat NO: 4461146            | ThermoFisher Scientific             |
| Dithiothreitol (White Crystals or Powder/Electrophoresis), Fisher BioReagents™   | Cat NO: BP172-25           | ThermoFisher Scientific             |
| QIAamp 96 Viral RNA Kit                                                          | Cat NO: / ID: 52904        | Qiagen                              |
| Illumina COVIDSeq Test kit                                                       | Cat NO: 20049393, 20051772 | Illumina                            |
| Qubit dsDNA HS Assay Kit                                                         | Cat NO: Q33230             | Thermofisher Scientific             |
| NovaSeq 6000 Sequencing System SP Reagent Kit                                    | Cat NO: 20040326           | Illumina                            |
| NovaSeq Xp 2-Lane Kit                                                            | Cat NO: 20021664           | Illumina                            |
| SARS-CoV-2 RUO qPCR Primer & Probe Kit                                           | Cat NO: 10006713           | Integrated DNA Technologies         |
| ProtoScript® II Reverse Transcriptase                                            | Cat NO: M0368L             | New England Biolabs                 |
| PrimeSTAR® HS DNA Polymerase                                                     | Cat NO:R010B               | Takara                              |
| TaqMan Fast Advanced Master Mix                                                  | Cat NO: 4444556            | ThermoFisher Scientific             |
| D-(+)-Trehalose, anhydrous 99%                                                   | Cat NO: AC30987-0250       | Thermo Scientific Chemicals         |
| Isopropyl β-d-1-thiogalactopyranoside                                            | Cat NO: I2481C             | Gold Biotechnology                  |
| LB Broth, Miller                                                                 | Cat NO: BP9723-500         | Fisher Scientific                   |
| Sodium Chloride                                                                  | Cat NO:7647-14-5           | Fisher Scientific                   |
| Tris-HCl                                                                         | Cat NO:BP153-500           | Fisher Scientific                   |
| Pierce™ TCEP-HCl                                                                 | Cat NO: 20490              | ThermoFisher Scientific             |
| HEPES                                                                            | Cat NO:75277-39-3          | Fisher Scientific                   |
| Sodium acetate                                                                   | Cat NO: S220-1             | Fisher Scientific                   |
| <b>Consumables</b>                                                               |                            |                                     |
| 0.22 μm filter                                                                   | Cat NO: SLGP033RS          | Millipore Sigma                     |

|                                                                    |                      |                         |
|--------------------------------------------------------------------|----------------------|-------------------------|
| 30 kDa MWCO Vivaspin® 20                                           | Cat NO: Z614637      | Satorius                |
| HiTrap® Heparin High Performance 1 mL HP column                    | Cat NO: GE17-0406-01 | Cytiva                  |
| Dialysis tubing                                                    | Cat NO: 470231-460   | Ward's Science          |
| Histrap 5 mL FF column                                             | Cat NO: 17525501     | Cytiva                  |
| MicroAmp Fast Optical 96-well Reaction Plate with Barcode          | Cat NO: 4346906      | Applied Biosystems      |
| MicroAmp 8-Cap Strip                                               | Cat NO: N8010535     | Applied Biosystems      |
| MicroAmp 8-tube Strip (0.2 mL)                                     | Cat NO: N8010580     | Applied Biosystems      |
| Microplate, PS, 96 Well, F-bottom, Black, Fluotrac, Medium binding | Cat NO: 6550076      | Greiner Bio-one         |
| <b>Equipment</b>                                                   |                      |                         |
| Mosquito HV Genomics Liquid Handler                                | Cat NO: G2991BA      | sptlabtech              |
| 4200 TapeStation System                                            |                      | Agilent                 |
| Bio-rad CFX96 Real-Time system with C1000 Thermal Cycler module    | Cat NO: 4376600      | Bio-rad                 |
| qPCR StepOne Plus system                                           |                      | ThermoFisher Scientific |
| HPLC 1100 system                                                   |                      | Agilent                 |

## References

1. Robert X, Gouet P. Deciphering key features in protein structures with the new ENDscript server. *Nucleic Acids Res.* 2014;42(Web Server issue):W320-4.
2. Yang H, Gao P, Rajashankar KR, Patel DJ. PAM-Dependent Target DNA Recognition and Cleavage by C2c1 CRISPR-Cas Endonuclease. *Cell.* 2016;167(7):1814-28 e12.
3. Sievers F, Wilm A, Dineen D, Gibson TJ, Karplus K, Li W, et al. Fast, scalable generation of high-quality protein multiple sequence alignments using Clustal Omega. *Mol Syst Biol.* 2011;7:539.
4. Goujon M, McWilliam H, Li WZ, Valentin F, Squizzato S, Paern J, et al. A new bioinformatics analysis tools framework at EMBL-EBI. *Nucleic Acids Research.* 2010;38:W695-W9.
